# Supplementary material for: LC-MS/MS Analysis of Cyanotoxins in Bivalve Mollusks—Method Development, Validation and First Evidence of Occurrence of Nodularin in Mussels (Mytilus edulis) and Oysters (Magallana gigas) from the West Coast of Sweden
Source: MDPI journal article supplement (doi:10.3390/toxins15050329), 2023-05-11
Supplement: s1 [file s1]

# Supplementary Materials: LC-MS/MS Analysis of Cyanotoxins in Bivalve Mollusks—Method Development, Validation and First Evidence of Occurrence of Nodularin in Mussels (*Mytilus edulis*) and Oysters (*Magallana gigas*) from the West Coast of Sweden

Julio César España Amórtegui, Heidi Pekar, Mark Dennis Chico Retrato, Malin Persson, Bengt Karlson, Jonas Bergquist and Aida Zuberovic-Muratovic

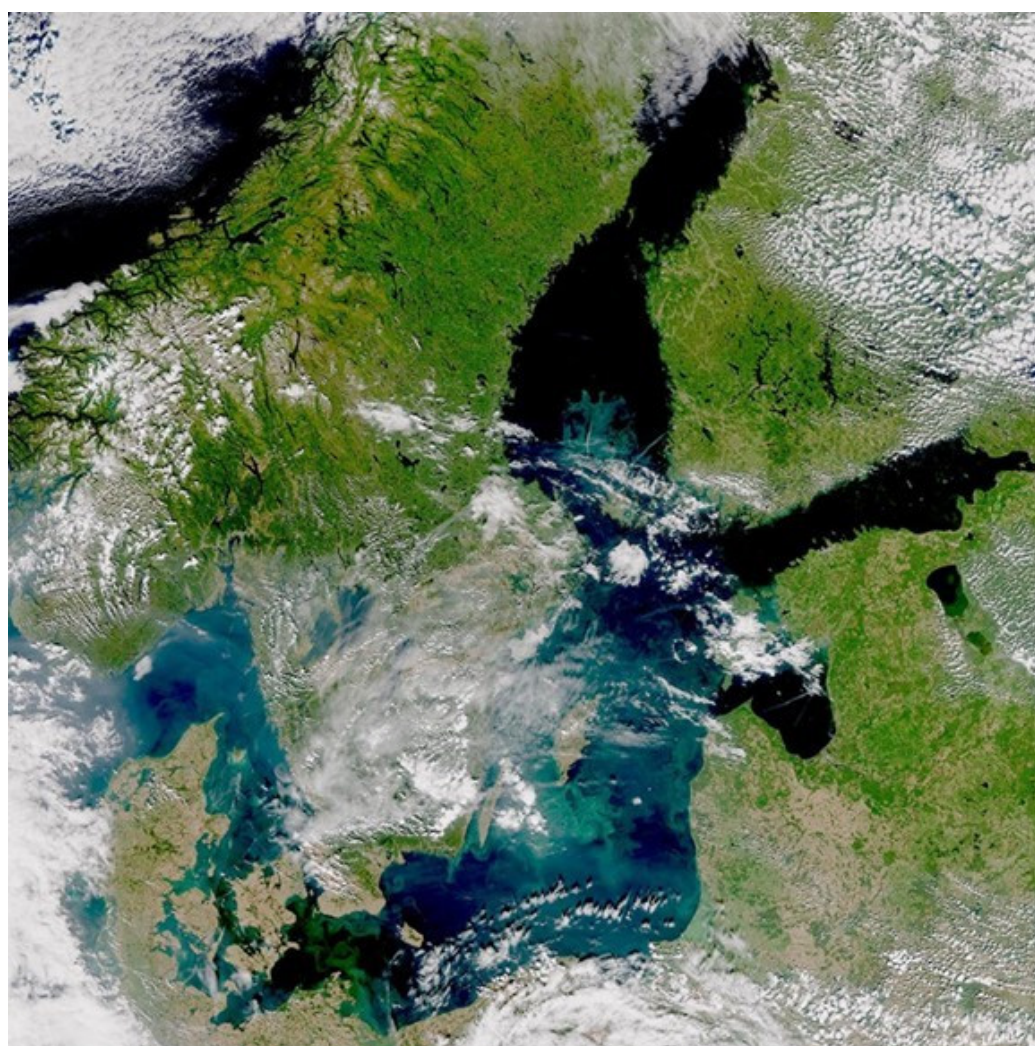

**Figure S1.** Cyanobacteria bloom, 17 August 2020. Available at the webpage of Swedish Metrological and Hydrological Institute (SMHI): <https://www.smhi.se/nyhetsarkiv/nystart-for-cyanobakterieblomningen-i-augusti-1.163168>.

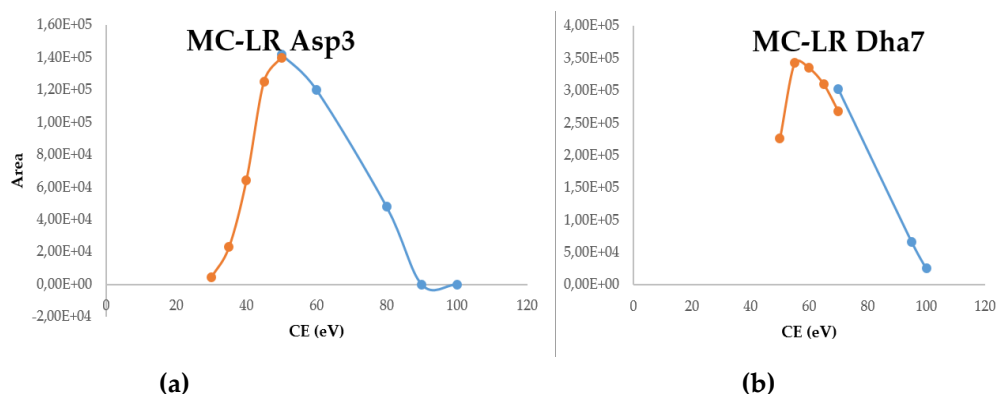

**Figure S2.** Optimization of the Collision Energy (eV) carried out in two subsequent MRM tests including the ranges in search for an inflexion point. The typical transition 981.5 > 135 was replaced by: (a) CE: 55 eV for microcystin LR [Asp3] transition 981.5 > 213; (b) CE: 55 eV for microcystin LR [Dha7] transition 981.5 > 269. The colors are different but correspond to the first test ramping down the energy until an arbitrary lower value that was not enough to see the maximum. It was necessary to extend the CE further to the lower bound in order to find an inflexion point.

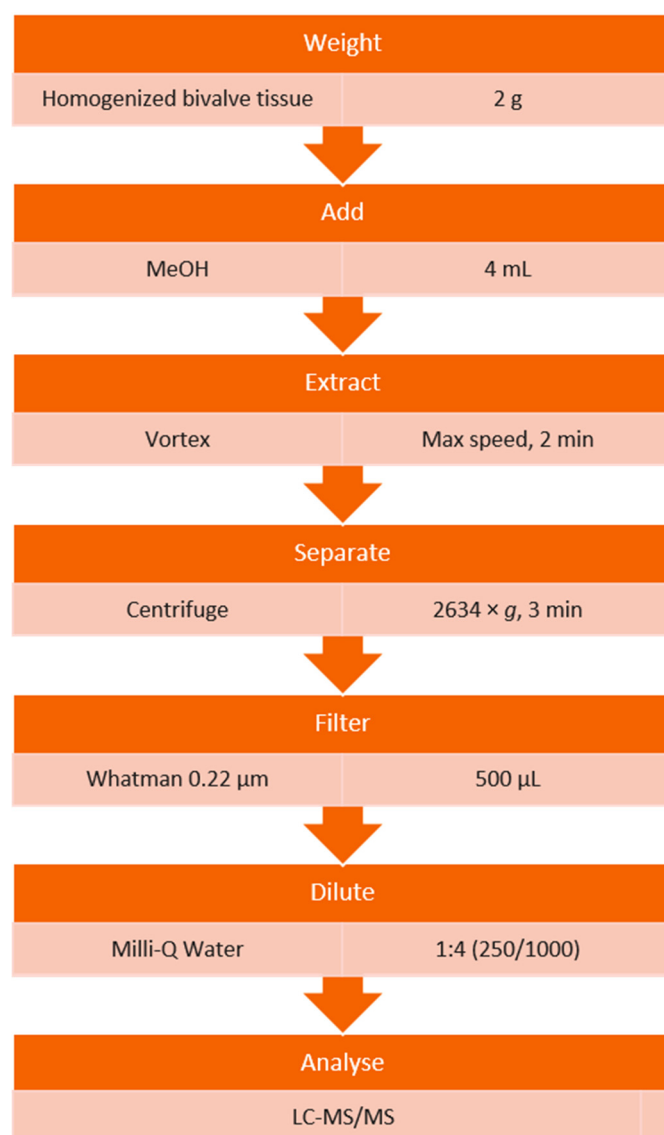

**Figure S3.** Protocol for the extraction of cyanotoxins from bivalve tissue. The centrifugation speed of  $2634 \times g$  corresponded to 3500 RPM. .

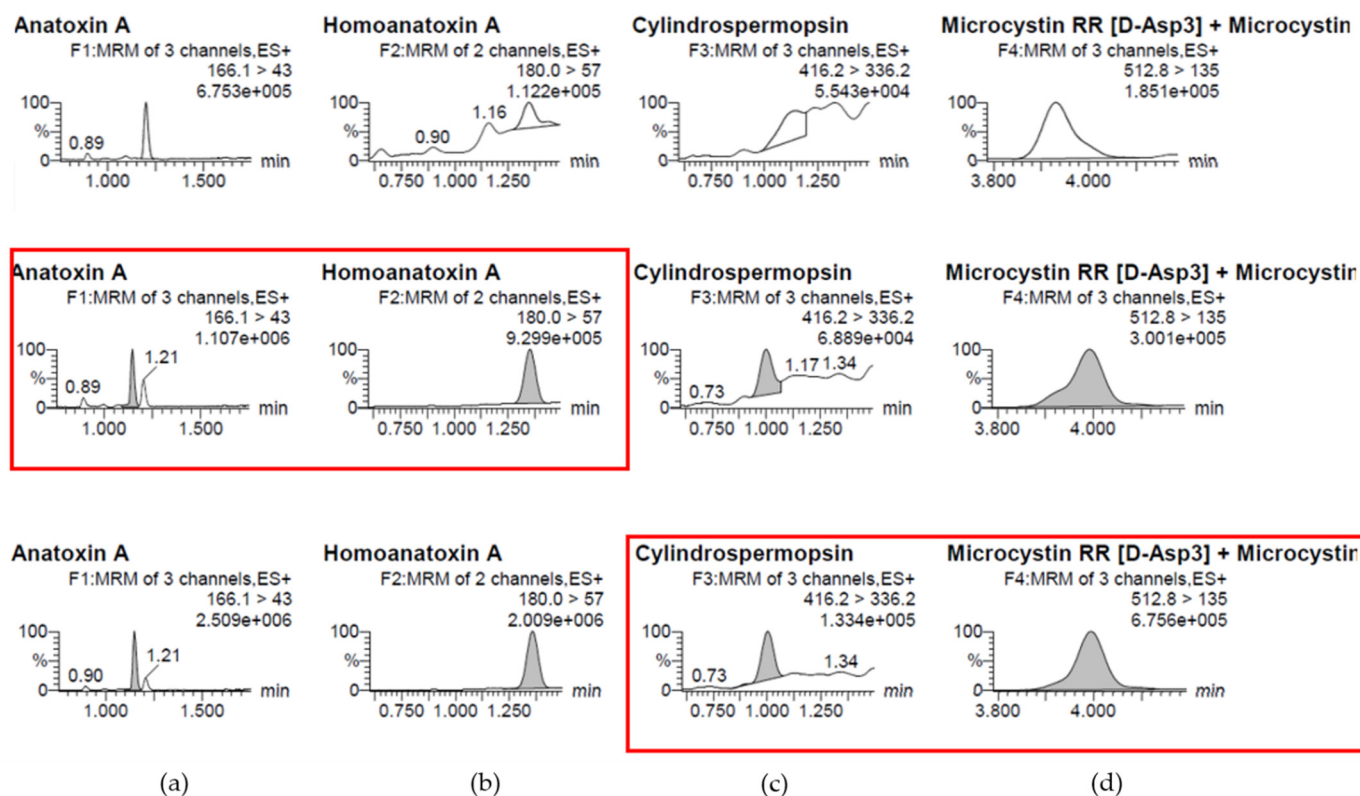

**Figure S4.** Selectivity over interferences in mussel matrix, the red square shows the levels chosen as lowest calibration level for each particular toxin. Top to bottom: blank, post-extraction blank with spiked levels L00 and L0, corresponding to  $3.13 \mu\text{g/kg}$  and  $6.25 \mu\text{g/kg}$ , respectively. (a) Anatoxin A: Adjacent peak with complete chromatographic resolution (b) Homonatoxin A: Presence of a peak on the same retention time in blank that is actually small ( $\sim 10\%$ ) compared to the peak spiked at  $3.13 \mu\text{g/kg}$ . (c) Cylindrospermopsin: Significant matrix noise resulted in  $6.25 \mu\text{g/kg}$  as the corresponding lowest calibrated level to ensure a higher S/N. (d) Microcystins RR [D-Asp3] + RR [D-Asp3, (E)-Dhb7]: The peak prevailed over the interference in blank at  $6.25 \mu\text{g/kg}$  which is only then seen as a small shoulder ( $< 30\%$ ).

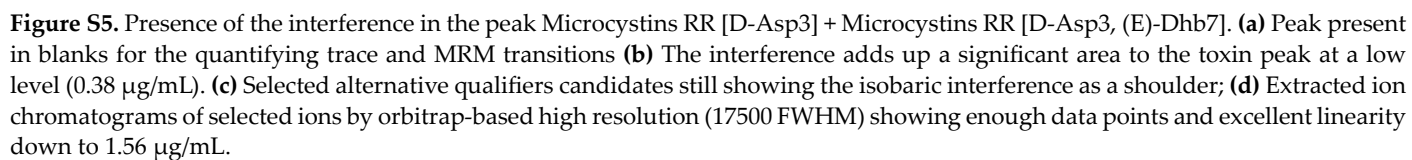



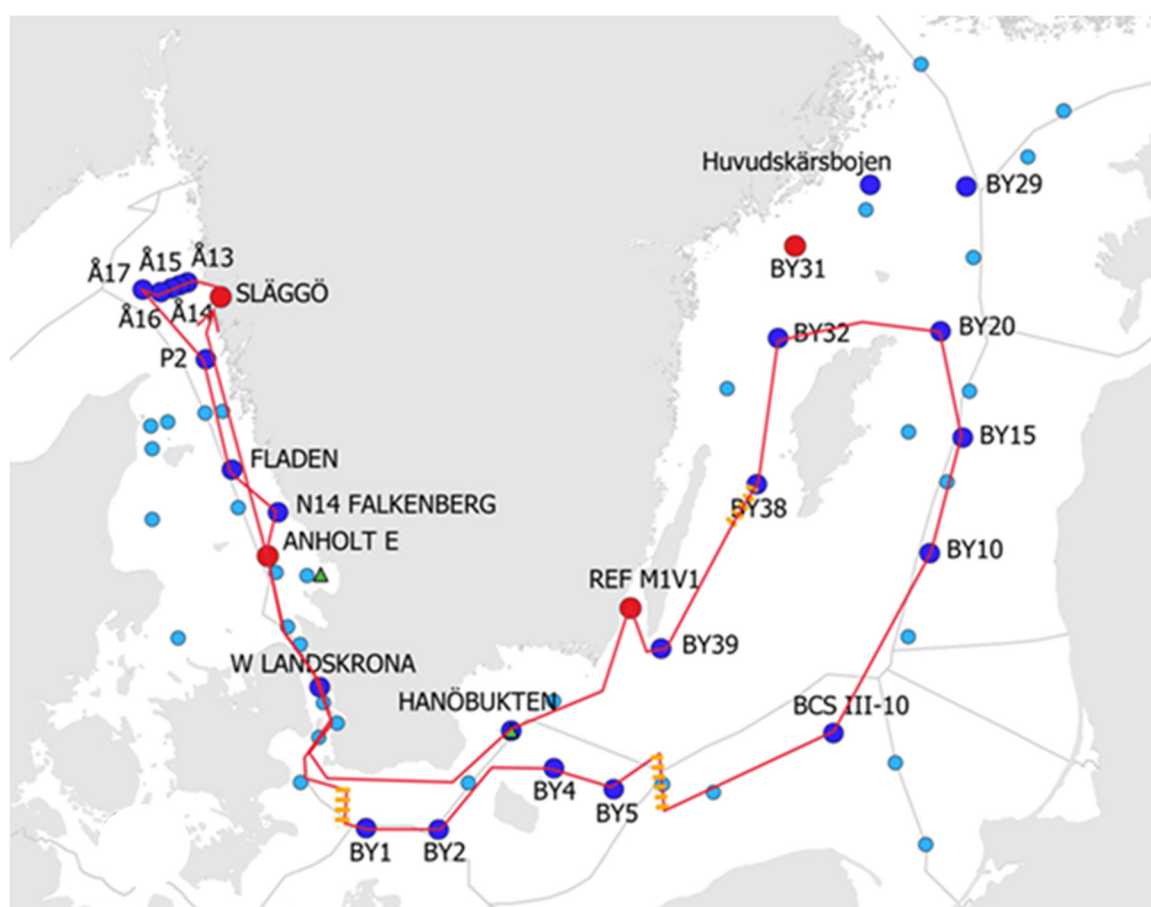

**Figure S6.** The route of the research vessel collecting phytoplankton samples in southern Sweden in July 2021.

**Table S1.** The reference standards of cyanotoxins included in the method.

| Compound name                     | Standard mix | Source                    |
|-----------------------------------|--------------|---------------------------|
| Anatoxin-a                        | A            | Teknolab Sverige AB       |
| Homoanatoxin-a                    | A            | Teknolab Sverige AB       |
| Cylindrospermopsin                | A            | Teknolab Sverige AB       |
| Nodularin                         | A            | Biosense Laboratories A/S |
| Microcystin-RR                    | A            | AH Diagnostics AB         |
| Microcystin-HtyR                  | A            | AH Diagnostics AB         |
| Microcystin-[D-Asp3]-LR           | A            | AH Diagnostics AB         |
| Microcystin-LA                    | B            | AH Diagnostics AB         |
| Microcystin-LF                    | B            | Teknolab Sverige AB       |
| Microcystin-LW                    | B            | Teknolab Sverige AB       |
| Microcystin-LY                    | B            | AH Diagnostics AB         |
| Microcystin-YR                    | B            | Teknolab Sverige AB       |
| Microcystin-LR                    | B            | AH Diagnostics AB         |
| Microcystin-WR                    | C            | AH Diagnostics AB         |
| Microcystin-HilR                  | C            | AH Diagnostics AB         |
| Microcystin-[Dha7]-LR             | C            | Teknolab Sverige AB       |
| Microcystin-[D-Asp3, (E)-Dhb7]-RR | C            | Teknolab Sverige AB       |

**Table S2.** MRM transitions in positive ESI mode. The transition to quantify the analogues Microcystin LR [Dha7] and Microcystin LR [Asp3] was set at a significantly lower, yet notably more convenient collision energy to achieve selectivity between this isobaric pair. Transitions in bold indicate the quantification trace. \*Isobars Microcystins RR [D-Asp3] + Microcystins RR [D-Asp3, (E)-Dhb7].

| Toxins                | Retention Time (min) | Trace (m/z)            | Ref.                                | Cone (V) | CE (eV) |
|-----------------------|----------------------|------------------------|-------------------------------------|----------|---------|
| Anatoxin A            | 1.15                 | <b>166 &gt; 43</b>     | Pekar, 2016                         | 10       | 20      |
|                       |                      | 166 > 91               | Pekar, 2016                         |          | 20      |
|                       |                      | 166 > 149              | Lemoine, 2013                       |          | 10      |
| Homoanatoxin A        | 1.35                 | <b>180 &gt; 57</b>     | Pekar, 2016                         | 10       | 20      |
|                       |                      | 180 > 163              | Pekar, 2016; Roy-Lachapelle, 2019   |          | 10      |
| Cylindrospermopsin    | 1.03                 | 416 > 176              | Pekar, 2016                         | 40       | 40      |
|                       |                      | 416 > 194              | Pekar, 2016; Roy-Lachapelle, 2019   |          | 30      |
|                       |                      | <b>416 &gt; 336</b>    | Pekar, 2016; Roy-Lachapelle, 2019   |          | 20      |
| Microcystins RR Sum*  | 3.99                 | 513 > 70               | Pekar, 2016                         | 60       | 50      |
|                       |                      | 513 > 103              | Pekar, 2016                         |          | 50      |
|                       |                      | <b>513 &gt; 135</b>    | Pekar, 2016                         |          | 30      |
| Microcystin RR        | 4.25                 | 520 > 103              | Pekar, 2016; Turner, 2018           | 30       | 70      |
|                       |                      | 520 > 127              | Pekar, 2016; Turner, 2018           |          | 50      |
|                       |                      | <b>520 &gt; 135</b>    | Pekar, 2016; Turner, 2018           |          | 30      |
| Nodularin             | 5.07                 | 825.5 > 103            | Pekar, 2016; Turner, 2018           | 55       | 100     |
|                       |                      | <b>825.5 &gt; 135</b>  | Pekar, 2016; Turner, 2018           |          | 60      |
| Microcystin LA        | 7.95                 | 910 > 107              | Turner, 2018                        | 35       | 80      |
|                       |                      | <b>910 &gt; 135</b>    | Pekar, 2016; Turner, 2018           |          | 70      |
|                       |                      | 910 > 375              | Birbeck, 2019                       |          | 70      |
|                       |                      | 910 > 776              | Pekar, 2016; Roy-Lachapelle, 2019   |          | 80      |
| Microcystin LR [Dha7] | 5.85                 | 981.5 > 113            | ----                                | 75       | 50      |
|                       |                      | 981.5 > 135            | Pekar, 2016; Turner, 2018           |          | 70      |
|                       |                      | <b>981.5 &gt; 269</b>  | ----                                |          | 50      |
| Microcystin LR [Asp3] | 6.02                 | 981.5 > 127            | ----                                | 75       | 60      |
|                       |                      | 981.5 > 135            | Pekar, 2016; Turner, 2018           |          | 75      |
|                       |                      | <b>981.5 &gt; 213</b>  | ----                                |          | 60      |
| Microcystin LF        | 8.90                 | <b>986.5 &gt; 135</b>  | Pekar, 2016; Turner, 2018           | 35       | 65      |
|                       |                      | 986.5 > 213            | Turner, 2018                        |          | 60      |
|                       |                      | 986.5 > 478            | Pekar, 2016; Birbeck, 2019          |          | 40      |
|                       |                      | 986.5 > 852            | Birbeck, 2019                       |          | 40      |
| Microcystin LR        | 5.89                 | 995.6 > 127            | Turner, 2018; Birbeck, 2019         | 60       | 90      |
|                       |                      | <b>995.6 &gt; 135</b>  | Pekar, 2016; Turner, 2018           |          | 70      |
| Microcystin LY        | 8.11                 | 1002.5 > 107           | Pekar, 2016; Turner, 2018           | 40       | 90      |
|                       |                      | <b>1002.5 &gt; 135</b> | Pekar, 2016; Turner, 2018           |          | 70      |
|                       |                      | 1002.5 > 494           | Birbeck, 2019                       |          | 50      |
|                       |                      | 1002.5 > 868           | Pekar, 2016                         |          | 50      |
| Microcystin HilR      | 6.22                 | 1009.7 > 107           | Turner, 2018                        | 75       | 90      |
|                       |                      | 1009.7 > 127           | Turner, 2018                        |          | 80      |
|                       |                      | <b>1009.7 &gt; 135</b> | Pekar, 2016                         |          | 75      |
| Microcystin LW        | 8.81                 | 1025.5 > 127           | Turner, 2018                        | 35       | 90      |
|                       |                      | <b>1025.5 &gt; 135</b> | Pekar, 2016; Turner, 2018           |          | 65      |
|                       |                      | 1025.5 > 517           | Birbeck, 2019; Roy-Lachapelle, 2019 |          | 35      |
| Microcystin YR        | 5.50                 | <b>1045.6 &gt; 127</b> | Turner, 2018                        | 75       | 90      |
|                       |                      | 1045.6 > 135           | Pekar, 2016; Turner, 2018           |          | 75      |
| Microcystin HtyR      | 5.64                 | <b>1059.6 &gt; 135</b> | Pekar, 2016; Turner, 2018           | 75       | 90      |
|                       |                      | 1059.6 > 107           | Pekar, 2016; Turner, 2018           |          | 70      |
| Microcystin WR        | 6.23                 | <b>1068.6 &gt; 135</b> | Pekar, 2016; Turner, 2018           | 80       | 100     |
|                       |                      | 1068.6 > 107           | Pekar, 2016; Turner, 2018           |          | 75      |

**Table S3.** PRM acquisition in positive ESI mode for the hybrid quadrupole-orbitrap LC-HRMS/MS. \*CE: Collision energy at the HCD (Higher Energy Collision Induced Dissociation), MS/MS stage able to produce triple quadrupole-like product ion mass spectra. \*Isobaric species of Microcystins RR [D-Asp3] + Microcystins RR [D-Asp3, (E)-Dhb7].

| Toxin name                            | Retention Time<br>(min) | Precursor<br>(m/z) | Charge<br>(z) | *CE<br>(eV) | Product ions<br>mass range (m/z) |
|---------------------------------------|-------------------------|--------------------|---------------|-------------|----------------------------------|
| Anatoxin-a                            | 1.66                    | 166.1226           | +1            | 10          | 50-190                           |
| Homoanatoxin-a                        | 1.95                    | 180.1383           | +1            | 25          | 50-205                           |
| Cylindrospermopsin                    | 1.08                    | 416.1234           | +1            | 25          | 50-445                           |
| <i>Microcystin – RR Sum*</i>          | 5.37                    | 512.7823           | +2            | 25          | 71.3-1070                        |
| Microcystin – RR                      | 5.52                    | 519.7902           | +2            | 25          | 72.3-1085                        |
| Microcystin – LA                      | 8.92                    | 776.4189           | +1            | 50          | 54-810                           |
| Nodularin – NOD                       | 6.10                    | 825.4505           | +1            | 40          | 57.3-860                         |
| Microcystin – LR [D-Asp3] & LR [Dha7] | 6.95                    | 981.5404           | +1            | 65          | 68-1020                          |
| Microcystin – LF                      | 9.40                    | 986.5234           | +1            | 50          | 68.3-1025                        |
| Microcystin – LR                      | 6.87                    | 995.5560           | +1            | 25          | 69-1035                          |
| Microcystin – LY                      | 9.06                    | 1002.5343          | +1            | 50          | 69.7-1045                        |
| Microcystin – HilR                    | 7.19                    | 1009.5717          | +1            | 50          | 70-1050                          |
| Microcystin – LW                      | 9.32                    | 1025.5343          | +1            | 50          | 71-1065                          |
| Microcystin – YR                      | 6.60                    | 1045.5353          | +1            | 50          | 72.3-1085                        |
| Microcystin – HtyR                    | 6.66                    | 1059.5509          | +1            | 50          | 73.3-1100                        |
| Microcystin – WR                      | 7.21                    | 1068.5513          | +1            | 50          | 74-1110                          |
